# Supplementary material for: Pathologic Response Rates for Breast Cancer Stages as a Predictor of Outcomes in Patients Receiving Neoadjuvant Chemotherapy Followed by Breast-Conserving Surgery
Source: Research Square preprint supplement (doi:10.21203/rs.3.rs-97674/v1), 2020-10-29
Supplement: Supplementary file 1 [file 17c6933d961dc832449c12ca.docx]

**Supplemental Figure 1. Multivariable Cox regression analysis for effect of downstaging of T-stages on (A) all causes of death, (B) locoregional recurrence (LRR)-free survival, (C) distant metastasis (DM)–free survival, and (D) disease-free (DF) survival.**

**
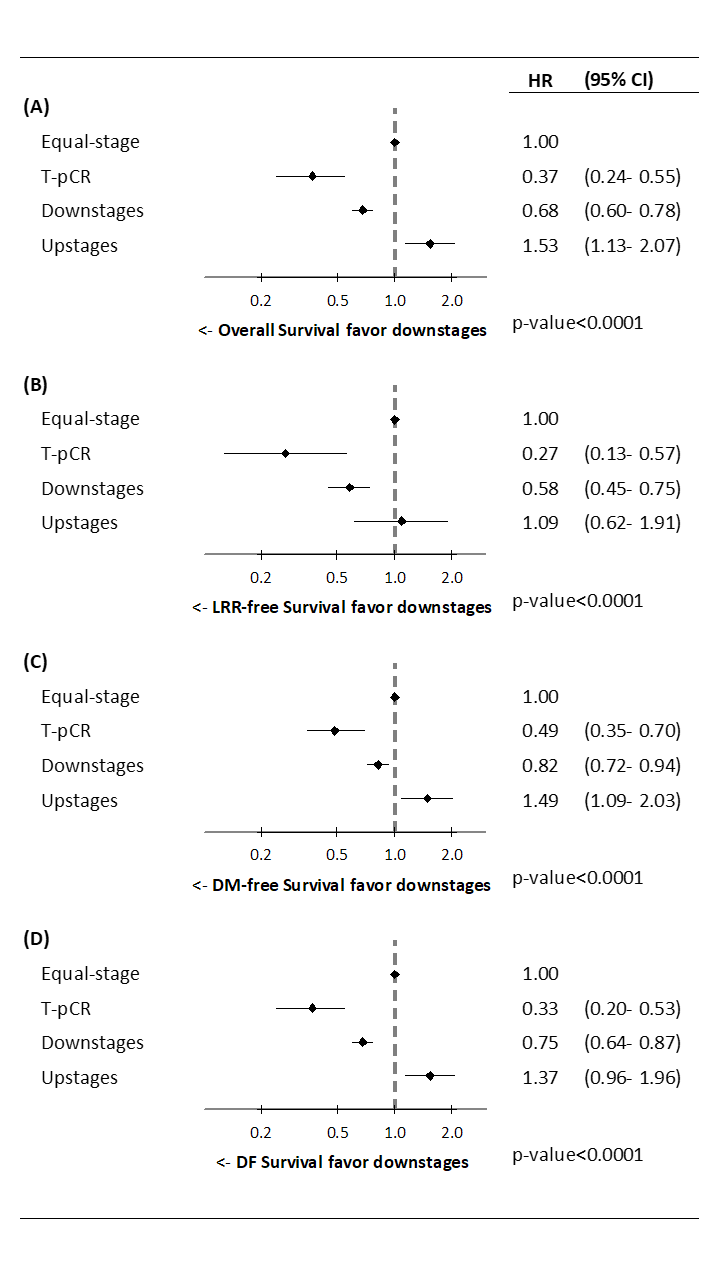
**

Adjusted hazard ratio: All variables presented in Table 2 were used in the multivariate analysis.

HR, hazard ratio; CI, confidence interval; RT, radiation therapy; T, tumor; N, nodal

**Supplemental Figure 2. Multivariable Cox regression analysis for effect of downstaging of N-stage on (A) all causes of death, (B) locoregional recurrence (LRR)-free survival, (C) distant metastasis (DM)–free survival, and (D) disease-free (DF) survival.
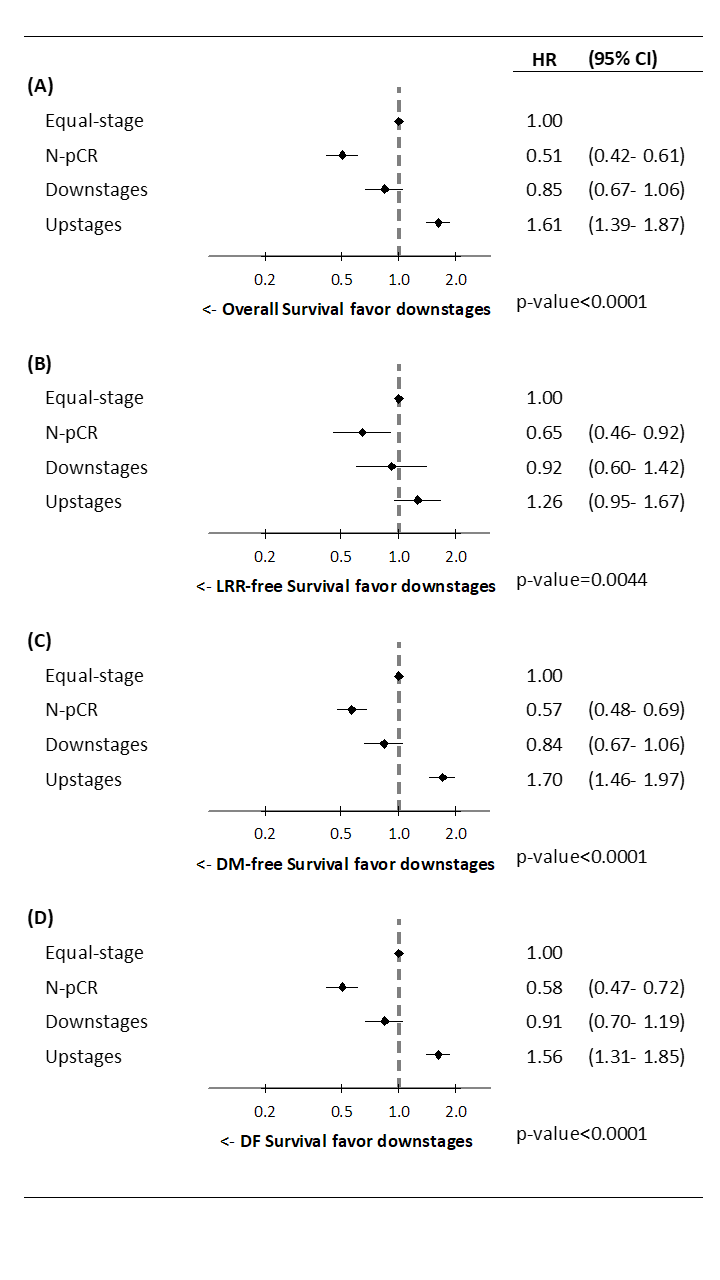
**

Adjusted hazard ratio: All variables presented in Table 2 were used in the multivariate analysis.

HR, hazard ratio; CI, confidence interval; RT, radiation therapy; T, tumor; N, nodal
